# Supplementary material
Source: PubMed Central journal article supplement (PMC8085855)
Supplement: ajcr0011-1185-f11.pdf [file ajcr0011-1185-f11.pdf]

## AKIP1, CXCL1, CXCL2 and CXCL8 in glioblastoma

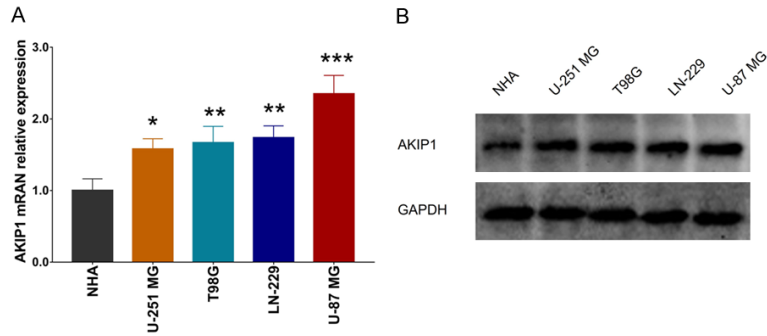

**Supplementary Figure 1.** AKIP1 expression in GBM cell lines. AKIP1 mRNA expression (A) and protein expression (B) between GBM cell lines and NHA cells (control cell line). AKIP1, A-kinase-interacting protein 1; GBM, glioblastoma multiforme.

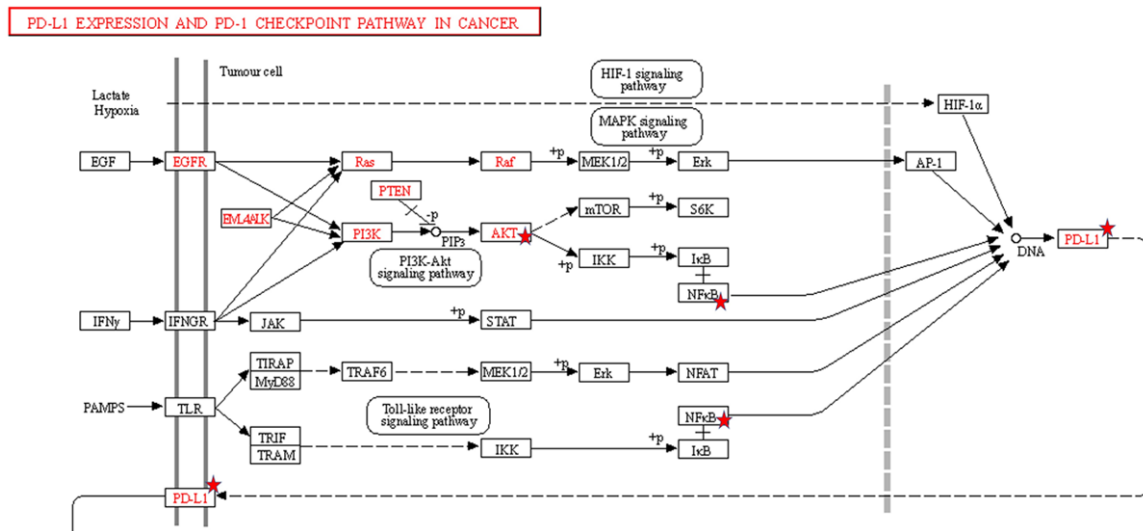

**Supplementary Figure 2.** Interaction between NF- $\kappa$ B/AKT and PD-L1 expression in cancer from Kyoto Encyclopedia of Genes and Genomes (KEGG) database (<https://www.kegg.jp/>). The red stars represented the NF- $\kappa$ B, AKT or PD-L1 in this regulation network.

# AKIP1, CXCL1, CXCL2 and CXCL8 in glioblastoma

## U-87 MG cells

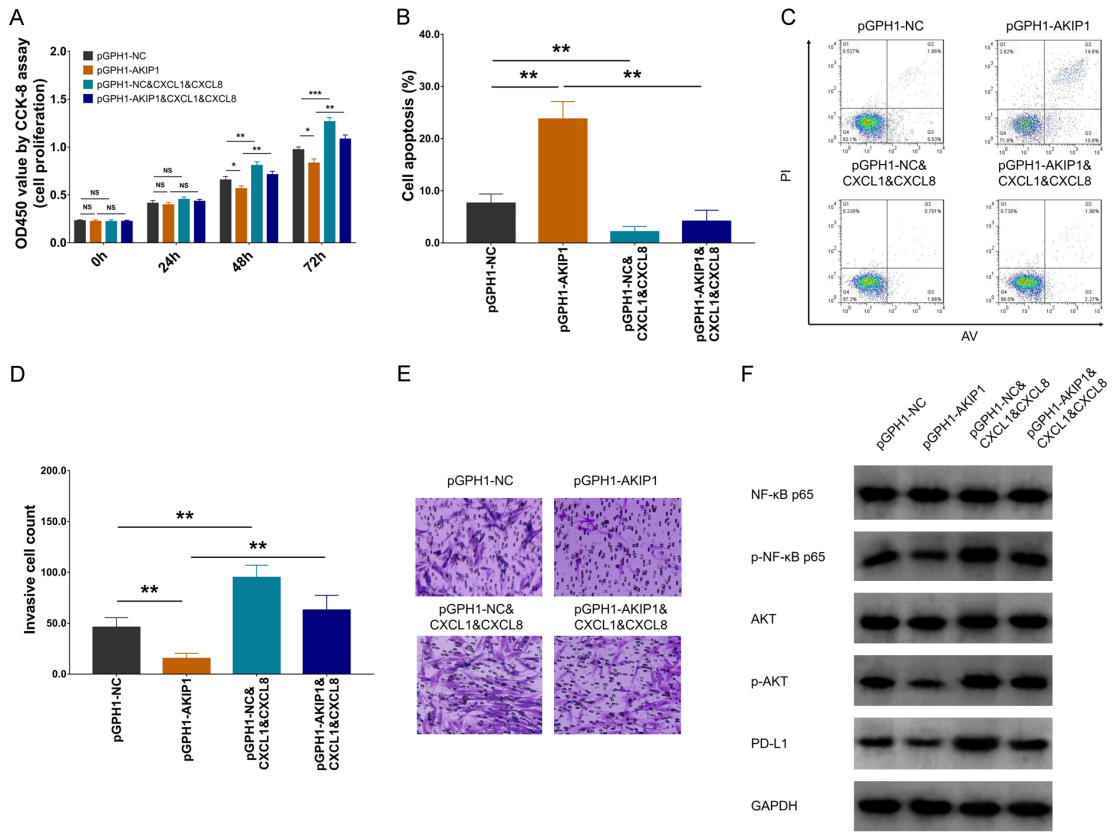

## U-251 MG cells

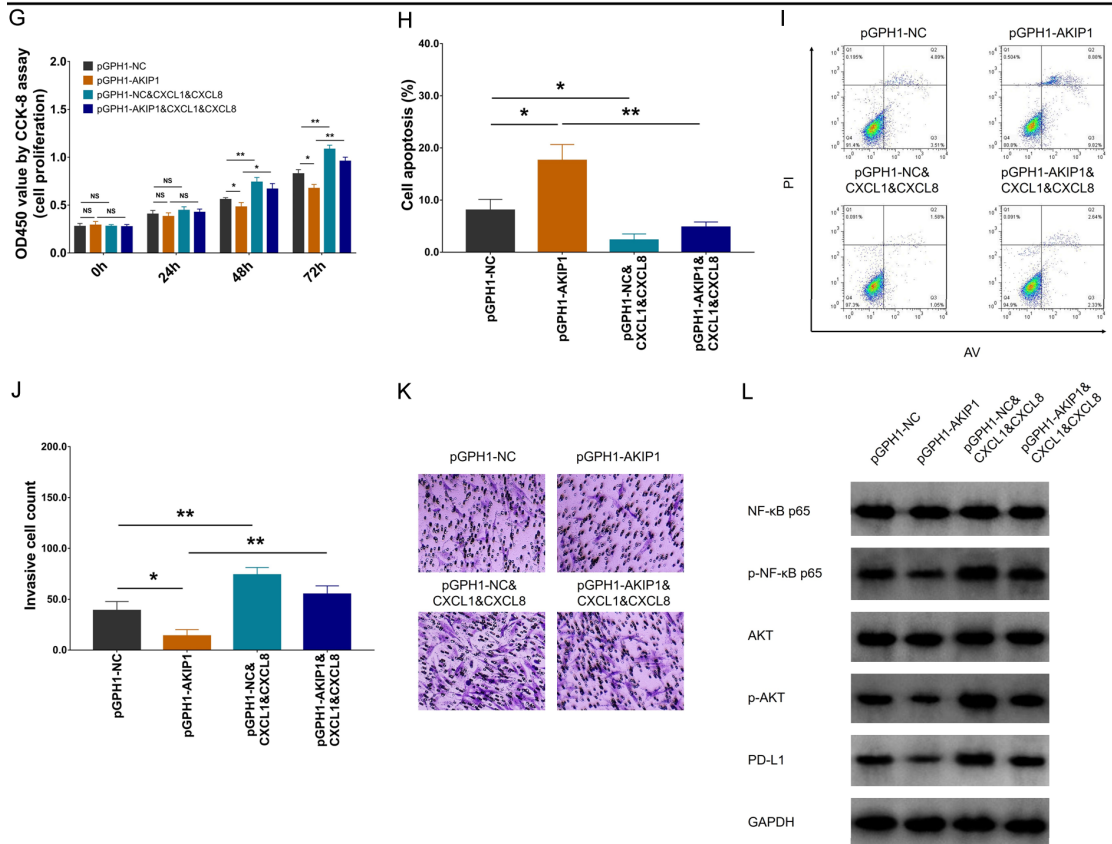

## AKIP1, CXCL1, CXCL2 and CXCL8 in glioblastoma

**Supplementary Figure 3.** CXCL1&CXCL8 attenuated the effect of AKIP1 knockdown on GBM malignant behaviors. Cell proliferation, apoptosis and invasion, as well as NF- $\kappa$ B p65, p-NF- $\kappa$ B p65, AKT, p-AKT, PD-L1 expressions among groups in U-87 MG cells (A-F) and U-251 MG cells (G-L), respectively. AKIP1, A-kinase-interacting protein 1; CXCL, C-X-C motif chemokine ligand; GBM, glioblastoma multiforme.

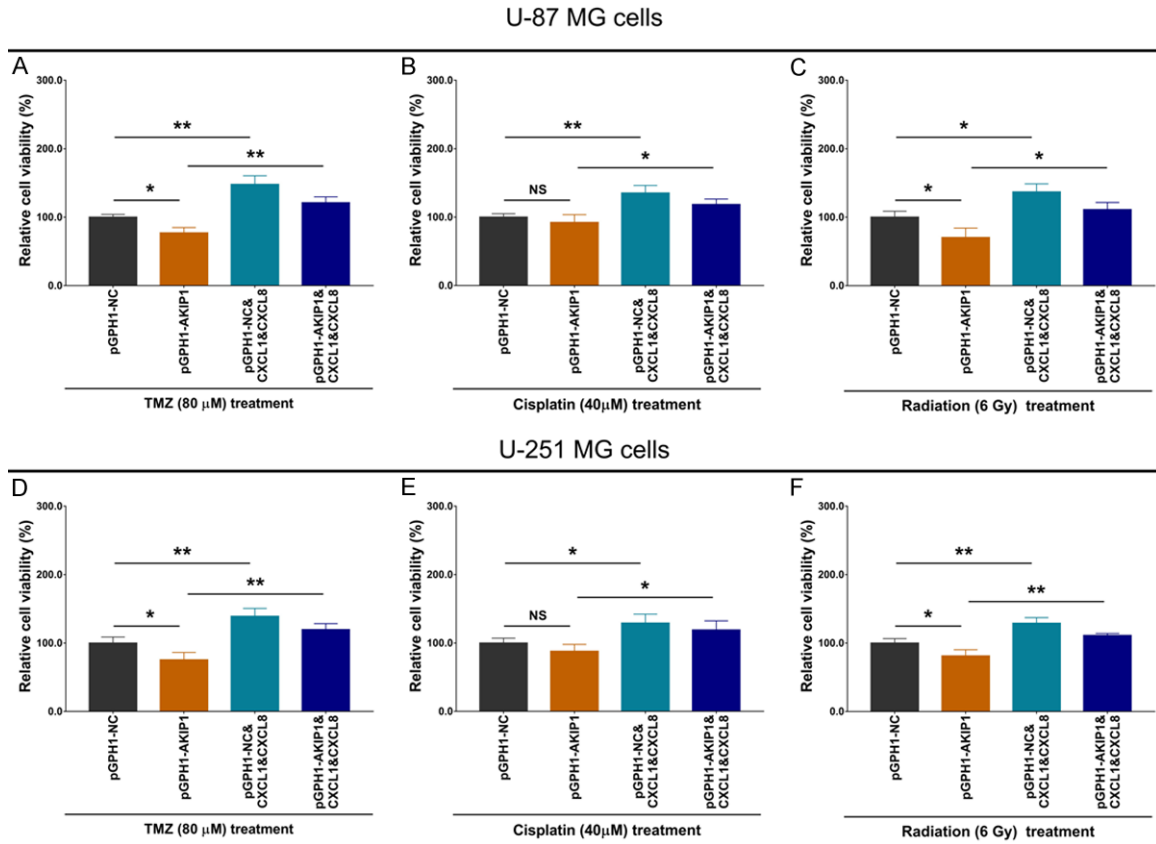

**Supplementary Figure 4.** CXCL1&CXCL8 attenuated the effect of AKIP1 knockdown on Chemoradiation sensitivity. Relative cell viability under 80  $\mu$ M TMZ treatment, or 40  $\mu$ M cisplatin treatment, or 6 Gy radiation treatment among groups in U-87 MG cells (A-C) and U-251 MG cells (D-F), respectively. AKIP1, A-kinase-interacting protein 1; NC, negative control; CXCL, C-X-C motif chemokine ligand; TMZ, temozolomide.

AKIP1, CXCL1, CXCL2 and CXCL8 in glioblastoma

U-87 MG cells

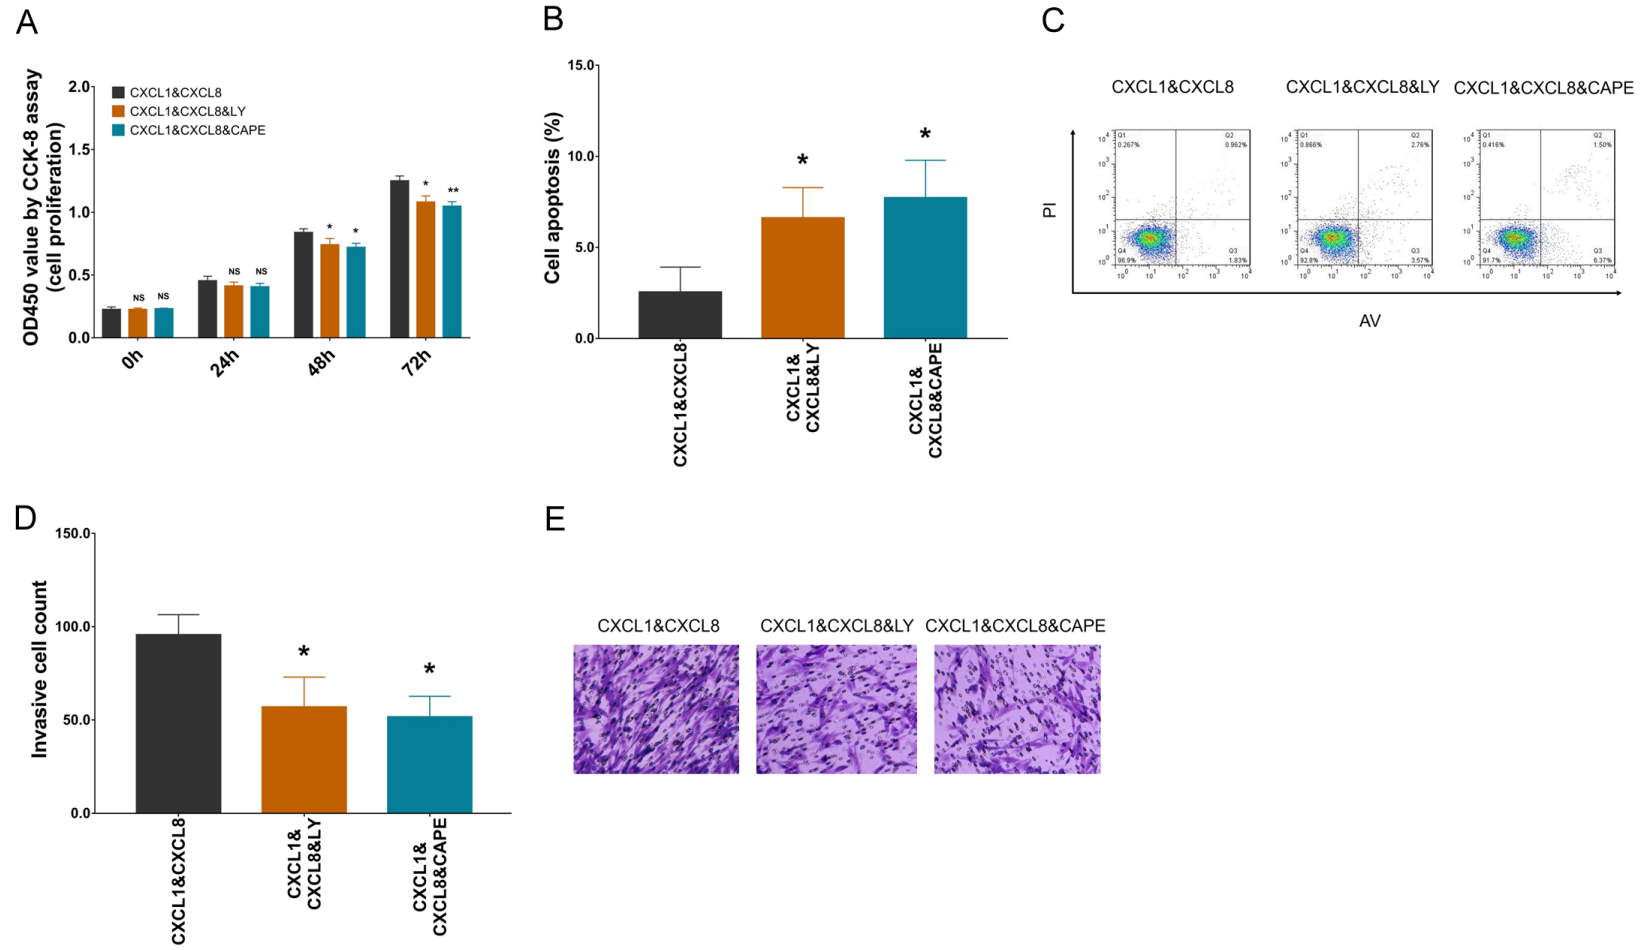

AKIP1, CXCL1, CXCL2 and CXCL8 in glioblastoma

U-251 MG cells

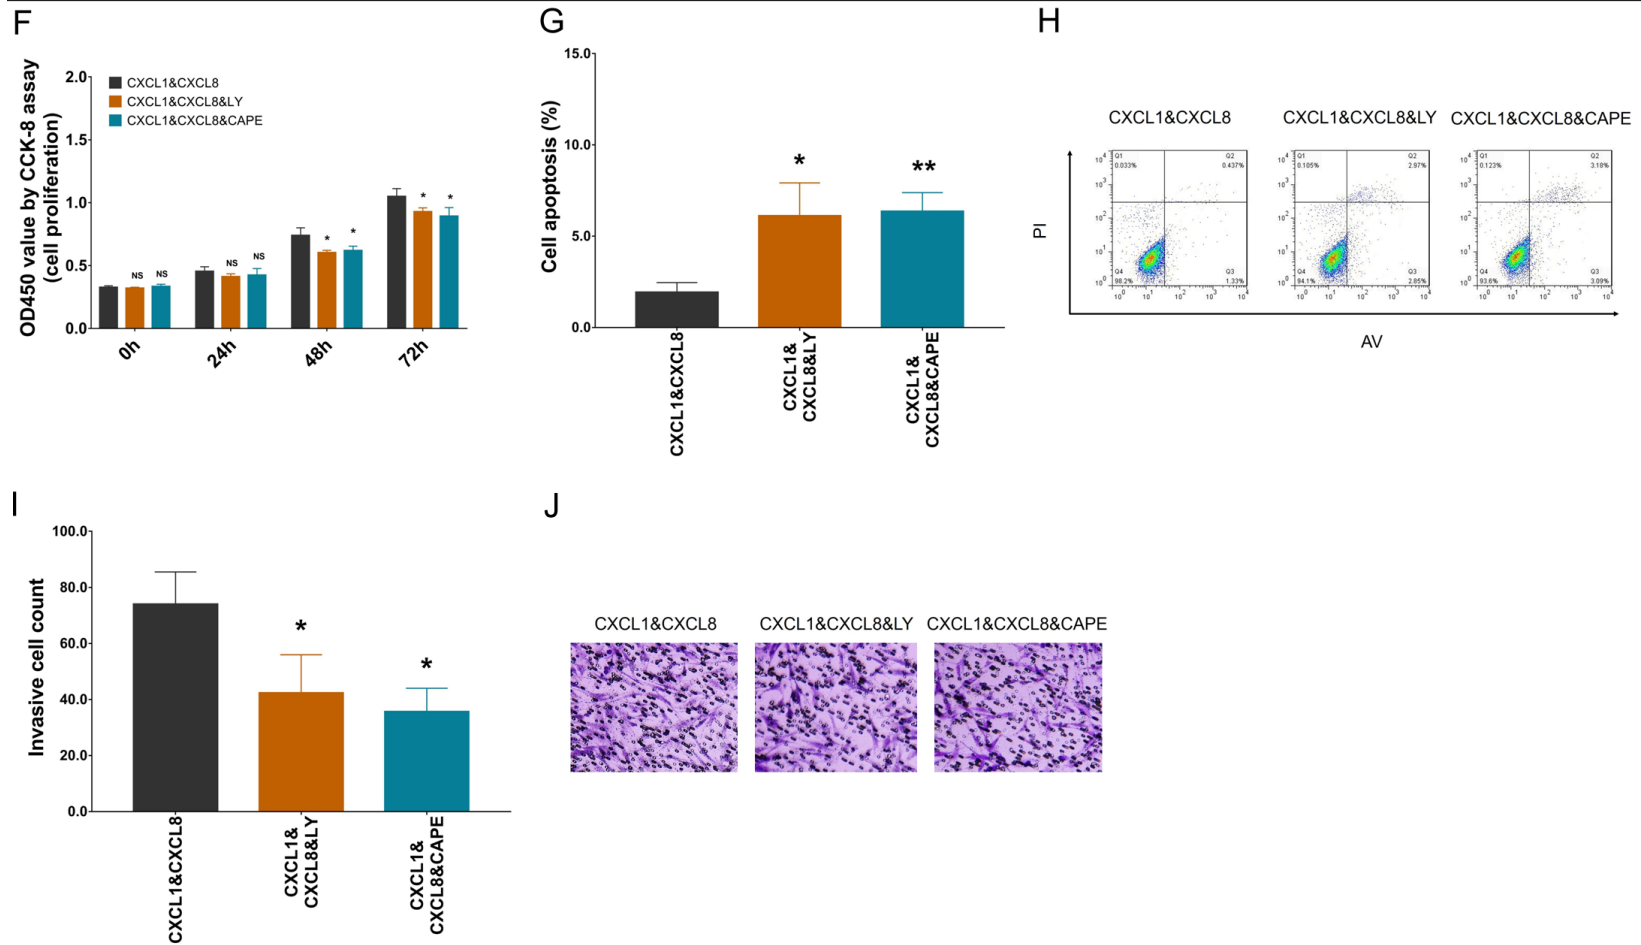

**Supplementary Figure 5.** NF- $\kappa$ B pathway inhibitor and AKT pathway inhibitor impaired the effect of CXCL1&CXCL8 on GBM malignant behaviors. Cell proliferation, apoptosis and invasion among groups in U-87 MG cells (A-E) and U-251 MG cells (F-J), respectively. CXCL, C-X-C motif chemokine ligand; GBM, glioblastoma multiforme.

## AKIP1, CXCL1, CXCL2 and CXCL8 in glioblastoma

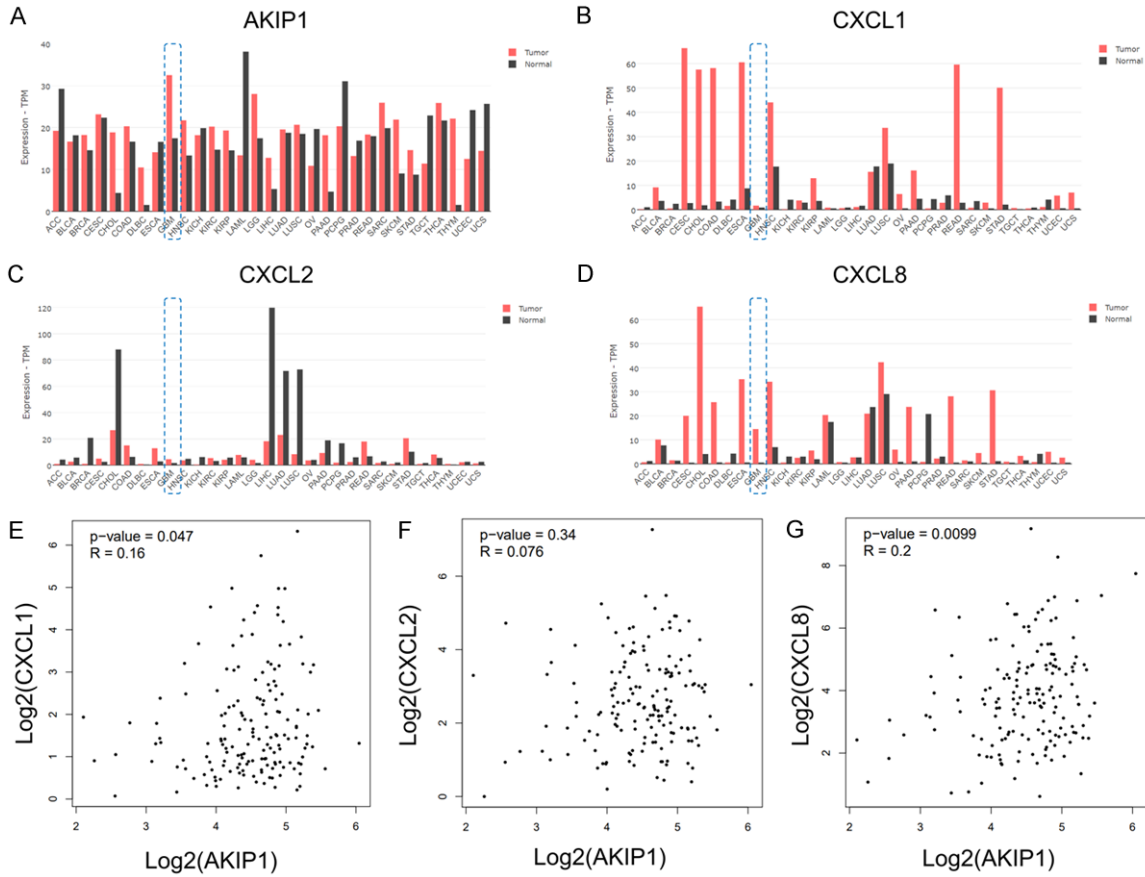

**Supplementary Figure 6.** AKIP1, CXCL1/2/8 expressions via GEPIA database. AKIP1 (A), CXCL1 (B), CXCL2 (C) and CXCL8 (D) expressions in tumor tissue compared to non-tumor tissue in cancers including GBM. Correlation of AKIP1 with CXCL1 (E), CXCL2 (F) and CXCL8 (G) in tumor tissue of GBM. AKIP1, A-kinase-interacting protein 1; CXCL, C-X-C motif chemokine ligand; GBM, glioblastoma multiforme.
